# Supplementary material for: Some Peculiarities of the Transference of the Rights to the State and Municipal Property in the Aspect of Antitrust Regulation
Source: MDPI journal article supplement (doi:10.3390/ijms25084375), 2012-01-01
Supplement: s1 [file s1]

**PfbZIP85 transcription factor mediates  $\omega$ -3 fatty acid-enriched oil biosynthesis by down-regulating *PfLPAT1B* gene expression in plant tissues**

**Additional file**

**Figure S1.** Chromosomal locations of *PfbZIP* genes.

**Figure S2.** PCR cloning of *PfbZIP52* and *PfbZIP85* genes ORF.

**Figure S3.** Diagrams showing different expression vectors.

**Figure S4.** Detection of self-activation of pHIS2-proPfGPAT1 and pHIS2-proPfLPAT1B bait vectors, respectively.

**Figure S5.** RT-PCR cloning of *PfLPAT1B* promoter.

**Figure S6.** PCR detection of transgenic tobacco plant overexpressing of *PfGPAT85* gene.

**Table S1.** The number of bZIP genes in the reported species.

**Table S2.** Basic physicochemical properties of PfbZIP members.

**Table S3.** Duplication gene pairs of *PfbZIP* genes.

**Table S4.** Duplication gene pairs of *bZIP* genes from *P. frutescens* and *A. thaliana*.

**Table S5.** Duplication gene pairs of *bZIP* genes from *P. frutescens* and *S. indicum*.

**Table S6.** Bacterial and yeast strains and plasmids used in this study.

**Table S7.** Primer sequences used in this study.

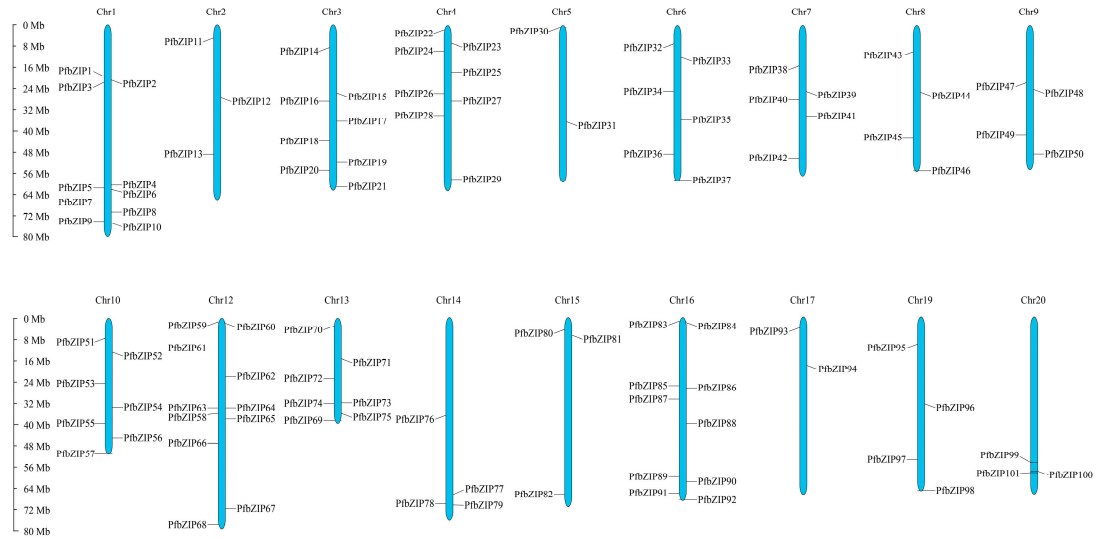

**Figure S1.** Chromosomal locations of *PfbZIP* genes. The relative length of the chromosomes is millions of base pairs (Mb).

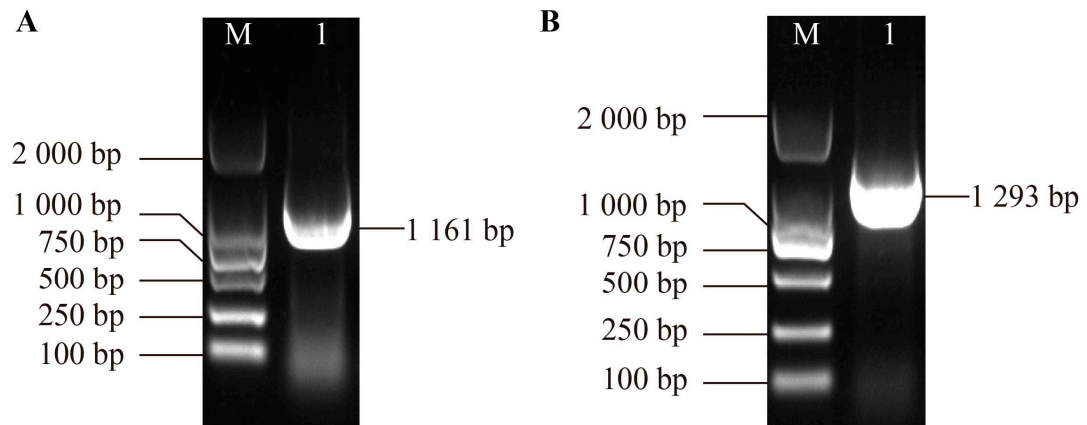

**Figure S2.** PCR cloning of *PfbZIP52* (A) and *PfbZIP85* (B) genes ORF. M, DNA Marker DL 2000; 1, The PCR product of full-length ORF of *PfbZIP52* (A) or *PfbZIP85* (B) gene.

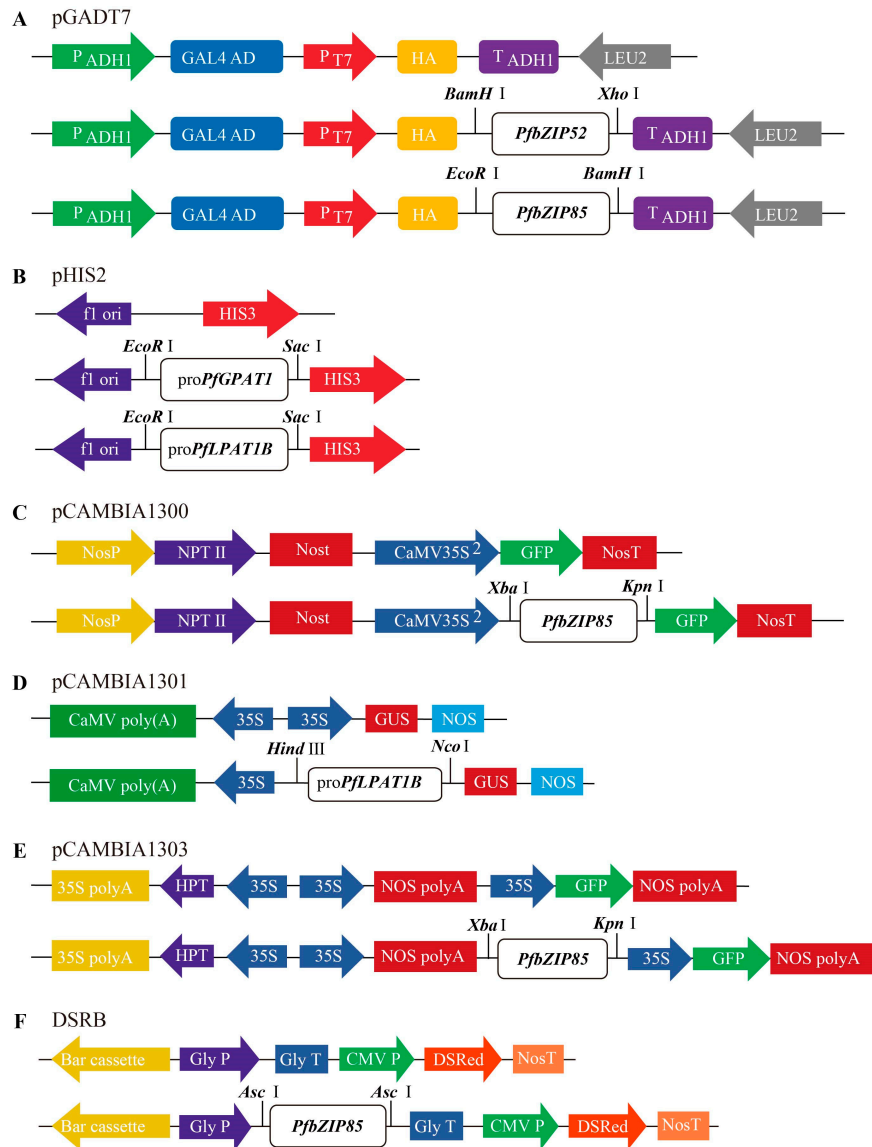

**Figure S3.** Diagrams showing different expression vectors. **(A)** Diagrams showing pGADT7+*PfbZIP52* and pGADT7+*PfbZIP85* prey vectors. **(B)** Diagrams showing pHIS2+*proPfGPAT1* and pHIS2+*proPfLPAT1B* bait vectors. **(C)** Diagram showing pCAMBIA1300+*PfbZIP85*/GFP expression vector. **(D)** Diagram showing pCAMBIA1301+*proPfLPAT1B* GUS expression vector. **(E)** Diagram showing pCAMBIA1303+*PfbZIP85* constitutive plant expression vector. **(F)** Diagram showing pJC-Gly-DSRB+*PfbZIP85* seed-specific plant expression vector.

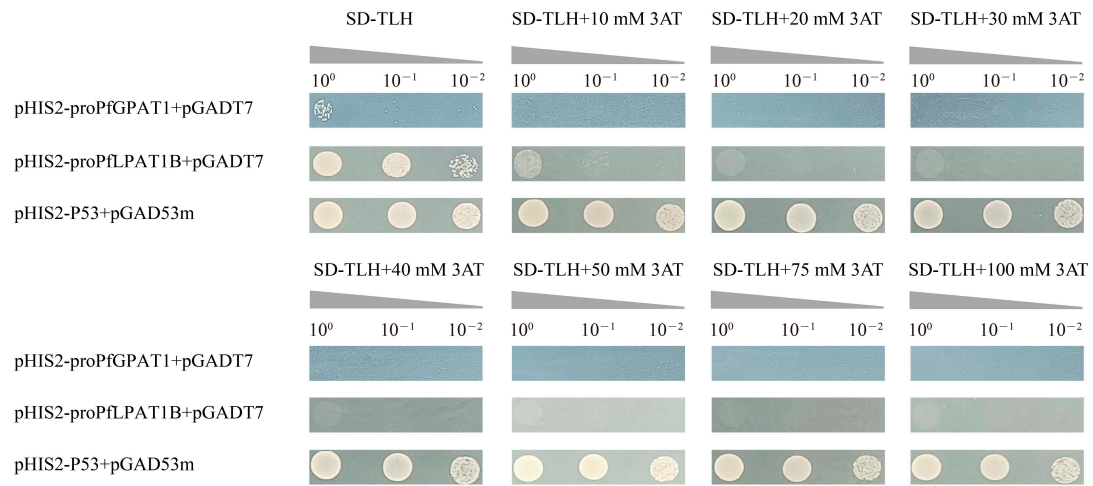

**Figure S4.** Detection of self-activation of pHIS2-proPfGPAT1 and pHIS2-proPfLPAT1B bait vectors, respectively.

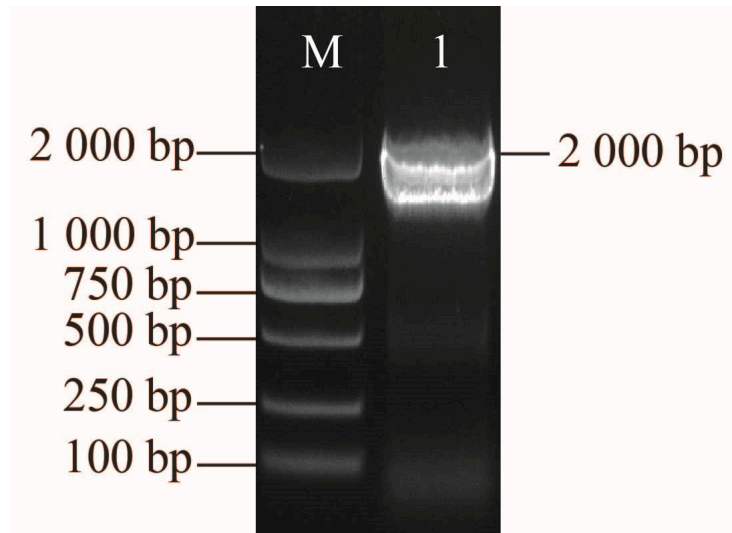

**Figure S5.** RT-PCR cloning of *PfLPAT1B* promoter. M, DNA Marker DL 2000; 1, The PCR product of the 2000 bp promoter region of *PfLPAT1B* gene.

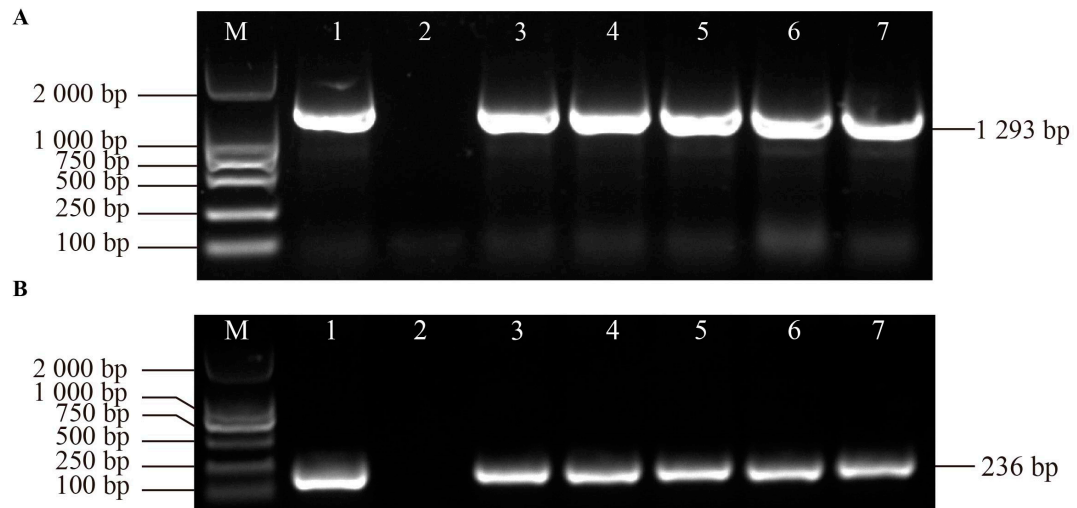

**Figure S5.** PCR detection of transgenic tobacco plant overexpressing of *PfGPAT85* gene. PCR detection of genomic level (**A**) and transcription level (**B**) of *PfGPAT85*-transgenic tobacco lines. M, DNA Marker DL 2000; 1, pCAMBIA1303+*PfbZIP85* recombinant plasmid; 2, the wild-type (WT) tobacco plant lines; 3–7, *PfbZIP85*-expressing tobacco plant lines.

**Table S1.** The number of bZIP genes in the reported species.

| Species                     | Number | References                                                                                                                                                                                                                                             |
|-----------------------------|--------|--------------------------------------------------------------------------------------------------------------------------------------------------------------------------------------------------------------------------------------------------------|
| <i>Ricinus communis</i>     | 100    | Jin Z, Xu W, Liu A. Genomic surveys and expression analysis of bZIP gene family in castor bean ( <i>Ricinus communis</i> L.). <i>Planta</i> . 2014; <b>239</b> (2):299-312.                                                                            |
| <i>Arabidopsis thaliana</i> | 75     | Jakoby M, Weisshaar B, Dröge-Laser W <i>et al.</i> bZIP Transcription Factors in Arabidopsis. <i>Trends Plant Sci</i> . 2002; <b>7</b> (3):106-111.                                                                                                    |
| <i>Oryza sativa</i>         | 89     | Nijhawan A, Jain M, Tyagi AK <i>et al.</i> Genomic survey and gene expression analysis of the basic leucine zipper transcription factor family in rice. <i>Plant Physiol</i> . 2008; <b>146</b> (2):333-350.                                           |
| <i>Zea mays</i>             | 125    | Wei K, Chen J, Wang Y <i>et al.</i> Genome-wide analysis of bZIP-encoding genes in maize. <i>DNA Res</i> . 2012; <b>19</b> (6):463-476.                                                                                                                |
| <i>Brassica napus</i>       | 247    | Zhou Y, Xu D, Jia L <i>et al.</i> Genome-Wide Identification and Structural Analysis of bZIP Transcription Factor Genes in <i>Brassica napus</i> . <i>Genes (Basel)</i> . 2017; <b>8</b> (10):288.                                                     |
| <i>Glycine max</i>          | 160    | Zhang M, Liu Y, Shi H <i>et al.</i> Evolutionary and expression analyses of soybean basic Leucine zipper transcription factor family. <i>BMC Genomics</i> . 2018; <b>19</b> (1):159.                                                                   |
| <i>Sesamum indicum</i>      | 63     | Wang Y, Zhang Y, Zhou R <i>et al.</i> Identification and characterization of the bZIP transcription factor family and its expression in response to abiotic stresses in sesame. <i>PLoS One</i> . 2018; <b>13</b> (7):e0200850.                        |
| <i>Arachis duranensis</i>   | 50     | Wang Z, Yan L, Wan L <i>et al.</i> Genome-wide systematic characterization of bZIP transcription factors and their expression profiles during seed development and in response to salt stress in peanut. <i>BMC Genomics</i> . 2019; <b>20</b> (1):51. |



**Table S2.** Basic physicochemical properties of PfbZIP members.

| Name     | Gene ID      | Chr | Start    | End      | Protein<br>length | MW<br>(kDa) | pI   | Group |
|----------|--------------|-----|----------|----------|-------------------|-------------|------|-------|
| PfbZIP1  | C2S51_001169 | 1   | 18793982 | 18795155 | 319               | 35.16       | 7.83 | A     |
| PfbZIP2  | C2S51_001228 | 1   | 19969850 | 19972784 | 779               | 84.22       | 5.62 | B     |
| PfbZIP3  | C2S51_001269 | 1   | 20645497 | 20648451 | 435               | 48.29       | 6.53 | D     |
| PfbZIP4  | C2S51_002235 | 1   | 57885237 | 57886406 | 319               | 35.11       | 7.83 | A     |
| PfbZIP5  | C2S51_002276 | 1   | 58894137 | 58897059 | 776               | 83.68       | 5.57 | B     |
| PfbZIP6  | C2S51_002305 | 1   | 59501620 | 59504560 | 435               | 48.31       | 6.78 | D     |
| PfbZIP7  | C2S51_002523 | 1   | 63876300 | 63878590 | 436               | 46.76       | 8.95 | A     |
| PfbZIP8  | C2S51_002704 | 1   | 67469834 | 67473896 | 450               | 47.7        | 6.65 | C     |
| PfbZIP9  | C2S51_002908 | 1   | 70879017 | 70883585 | 650               | 71.83       | 6.48 | A     |
| PfbZIP10 | C2S51_002937 | 1   | 71399582 | 71402681 | 430               | 47.88       | 7.82 | D     |
| PfbZIP11 | C2S51_019884 | 2   | 4802218  | 4805547  | 470               | 51.71       | 6.33 | D     |
| PfbZIP12 | C2S51_020224 | 2   | 26452169 | 26457035 | 328               | 36.73       | 7.89 | D     |
| PfbZIP13 | C2S51_020868 | 2   | 46646977 | 46650157 | 401               | 43.84       | 6.47 | I     |
| PfbZIP14 | C2S51_021918 | 3   | 8246510  | 8265677  | 341               | 39.47       | 4.84 | UC    |
| PfbZIP15 | C2S51_022229 | 3   | 24577432 | 24580467 | 402               | 43.98       | 5.8  | G     |
| PfbZIP16 | C2S51_022321 | 3   | 27558449 | 27561280 | 558               | 61.38       | 6.27 | I     |
| PfbZIP17 | C2S51_022630 | 3   | 34700288 | 34705109 | 326               | 36.36       | 8.64 | D     |
| PfbZIP18 | C2S51_022920 | 3   | 41990406 | 41990822 | 138               | 15.6        | 6.74 | S     |
| PfbZIP19 | C2S51_023242 | 3   | 49739451 | 49740360 | 198               | 22.81       | 9.9  | UC    |
| PfbZIP20 | C2S51_023394 | 3   | 52355613 | 52356329 | 238               | 26.3        | 5.82 | F     |
| PfbZIP21 | C2S51_023820 | 3   | 58471737 | 58472417 | 226               | 25.28       | 9.69 | A     |
| PfbZIP22 | C2S51_024072 | 4   | 1628422  | 1629564  | 277               | 31.34       | 7.22 | UC    |
| PfbZIP23 | C2S51_024442 | 4   | 6525446  | 6526162  | 238               | 26.46       | 5.94 | F     |
| PfbZIP24 | C2S51_024604 | 4   | 9111060  | 9112074  | 198               | 22.86       | 10.1 | UC    |
| PfbZIP25 | C2S51_024987 | 4   | 16785430 | 16785846 | 138               | 15.6        | 6.74 | S     |
| PfbZIP26 | C2S51_025355 | 4   | 24517366 | 24522125 | 326               | 36.36       | 8.64 | D     |
| PfbZIP27 | C2S51_025469 | 4   | 27273165 | 27274419 | 282               | 29.61       | 5.41 | A     |
| PfbZIP28 | C2S51_025706 | 4   | 32607278 | 32610149 | 562               | 62.02       | 6.12 | I     |
| PfbZIP29 | C2S51_026235 | 4   | 55653134 | 55657225 | 382               | 42.31       | 6.03 | D     |
| PfbZIP30 | C2S51_026407 | 5   | 759290   | 759757   | 155               | 18.47       | 8.66 | C     |
| PfbZIP31 | C2S51_027522 | 5   | 34787058 | 34791922 | 328               | 36.74       | 7.89 | D     |
| PfbZIP32 | C2S51_028307 | 6   | 6636665  | 6637258  | 197               | 22.8        | 5.97 | S     |

|          |              |    |          |          |     |       |       |    |
|----------|--------------|----|----------|----------|-----|-------|-------|----|
| PfbZIP33 | C2S51_028562 | 6  | 11512935 | 11514484 | 385 | 42.86 | 8.56  | A  |
| PfbZIP34 | C2S51_029023 | 6  | 23898663 | 23905096 | 358 | 37.89 | 5.65  | G  |
| PfbZIP35 | C2S51_029304 | 6  | 34081401 | 34084011 | 361 | 40.59 | 6.73  | D  |
| PfbZIP36 | C2S51_029471 | 6  | 46323536 | 46326583 | 762 | 81.93 | 6.36  | B  |
| PfbZIP37 | C2S51_029630 | 6  | 55769789 | 55770205 | 138 | 15.58 | 6.74  | S  |
| PfbZIP38 | C2S51_029973 | 7  | 14672249 | 14673613 | 225 | 26.05 | 9.37  | UC |
| PfbZIP39 | C2S51_030271 | 7  | 23905348 | 23905875 | 175 | 20.32 | 5.98  | S  |
| PfbZIP40 | C2S51_030360 | 7  | 26864674 | 26867886 | 337 | 37.28 | 5.6   | I  |
| PfbZIP41 | C2S51_030554 | 7  | 32890032 | 32893589 | 311 | 35.26 | 6.52  | UC |
| PfbZIP42 | C2S51_031284 | 7  | 47909162 | 47909719 | 185 | 21.58 | 5.44  | S  |
| PfbZIP43 | C2S51_032111 | 8  | 9548738  | 9550409  | 366 | 41.31 | 6.62  | D  |
| PfbZIP44 | C2S51_032456 | 8  | 24101605 | 24105937 | 364 | 39.68 | 7.93  | C  |
| PfbZIP45 | C2S51_032655 | 8  | 40567692 | 40571478 | 395 | 41.69 | 6.68  | G  |
| PfbZIP46 | C2S51_033010 | 8  | 52369743 | 52370727 | 112 | 12.07 | 10.88 | H  |
| PfbZIP47 | C2S51_033598 | 9  | 20730351 | 20730878 | 175 | 20.23 | 5.98  | S  |
| PfbZIP48 | C2S51_033661 | 9  | 23164144 | 23167366 | 337 | 37.21 | 5.51  | I  |
| PfbZIP49 | C2S51_034184 | 9  | 39346628 | 39350425 | 415 | 46.11 | 7.13  | UC |
| PfbZIP50 | C2S51_034508 | 9  | 46238775 | 46239332 | 185 | 21.5  | 5.45  | S  |
| PfbZIP51 | C2S51_035146 | 10 | 7116760  | 7117353  | 197 | 22.81 | 5.97  | S  |
| PfbZIP52 | C2S51_035357 | 10 | 12200992 | 12202559 | 386 | 42.9  | 7.76  | A  |
| PfbZIP53 | C2S51_035745 | 10 | 23570435 | 23577057 | 358 | 37.89 | 5.65  | G  |
| PfbZIP54 | C2S51_035968 | 10 | 32073021 | 32075623 | 361 | 40.62 | 6.73  | D  |
| PfbZIP55 | C2S51_036057 | 10 | 37770900 | 37771610 | 236 | 27.35 | 10.55 | S  |
| PfbZIP56 | C2S51_036102 | 10 | 43273947 | 43277007 | 764 | 82.16 | 6.28  | B  |
| PfbZIP57 | C2S51_036246 | 10 | 48798773 | 48799189 | 138 | 15.57 | 6.74  | S  |
| PfbZIP58 | C2S51_000027 | 12 | 34366593 | 34369459 | 385 | 41.39 | 6.15  | G  |
| PfbZIP59 | C2S51_003355 | 12 | 1273545  | 1275527  | 446 | 48.86 | 7.24  | I  |
| PfbZIP60 | C2S51_003384 | 12 | 1905606  | 1905989  | 127 | 14.25 | 6.72  | S  |
| PfbZIP61 | C2S51_003549 | 12 | 10807494 | 10807850 | 118 | 14    | 9.57  | S  |
| PfbZIP62 | C2S51_003720 | 12 | 21057855 | 21059759 | 283 | 31.54 | 6.67  | E  |
| PfbZIP63 | C2S51_004167 | 12 | 32285335 | 32287342 | 261 | 28.53 | 8.86  | I  |
| PfbZIP64 | C2S51_004172 | 12 | 32349964 | 32351611 | 175 | 20.05 | 9.51  | A  |
| PfbZIP65 | C2S51_004384 | 12 | 36438077 | 36438532 | 151 | 16.83 | 7.87  | S  |
| PfbZIP66 | C2S51_004789 | 12 | 45071361 | 45077293 | 486 | 54.08 | 6.93  | D  |
| PfbZIP67 | C2S51_005961 | 12 | 68525641 | 68529725 | 322 | 35.83 | 5.36  | C  |
| PfbZIP68 | C2S51_006383 | 12 | 74467200 | 74468343 | 277 | 31.4  | 6.87  | UC |

|           |              |    |          |          |      |        |       |    |
|-----------|--------------|----|----------|----------|------|--------|-------|----|
| PfbZIP69  | C2S51_000426 | 13 | 36799720 | 36802620 | 385  | 41.34  | 6.15  | G  |
| PfbZIP70  | C2S51_037514 | 13 | 2858269  | 2858691  | 140  | 16.47  | 6.71  | S  |
| PfbZIP71  | C2S51_037725 | 13 | 14647979 | 14649837 | 283  | 31.54  | 7.07  | E  |
| PfbZIP72  | C2S51_037958 | 13 | 21785305 | 21787653 | 310  | 34.78  | 6.1   | E  |
| PfbZIP73  | C2S51_038307 | 13 | 30555986 | 30557988 | 260  | 28.37  | 8.86  | I  |
| PfbZIP74  | C2S51_038314 | 13 | 30633998 | 30635637 | 175  | 20.22  | 9.21  | A  |
| PfbZIP75  | C2S51_038468 | 13 | 34416257 | 34416712 | 151  | 16.78  | 6.96  | S  |
| PfbZIP76  | C2S51_007199 | 14 | 35387002 | 35388358 | 226  | 26.18  | 8.88  | UC |
| PfbZIP77  | C2S51_007705 | 14 | 63832104 | 63833316 | 206  | 23.84  | 5.37  | A  |
| PfbZIP78  | C2S51_007809 | 14 | 67133077 | 67134094 | 279  | 30.15  | 5.01  | A  |
| PfbZIP79  | C2S51_007829 | 14 | 67702351 | 67704714 | 174  | 19.37  | 9.98  | I  |
| PfbZIP80  | C2S51_008317 | 15 | 4468205  | 4470711  | 567  | 62.01  | 6.21  | I  |
| PfbZIP81  | C2S51_008371 | 15 | 6453444  | 6454382  | 312  | 34.46  | 5.85  | F  |
| PfbZIP82  | C2S51_009704 | 15 | 63666023 | 63667961 | 340  | 38.02  | 6.56  | I  |
| PfbZIP83  | C2S51_010049 | 16 | 1228350  | 1236456  | 866  | 95.6   | 9.11  | I  |
| PfbZIP84  | C2S51_010072 | 16 | 1719047  | 1719421  | 124  | 13.95  | 6.72  | S  |
| PfbZIP85  | C2S51_010603 | 16 | 24681391 | 24684518 | 430  | 47.91  | 6.74  | D  |
| PfbZIP86  | C2S51_010640 | 16 | 25245422 | 25250053 | 656  | 72.38  | 6.59  | A  |
| PfbZIP87  | C2S51_010886 | 16 | 29375877 | 29379936 | 449  | 47.57  | 6.65  | C  |
| PfbZIP88  | C2S51_011446 | 16 | 38092456 | 38098382 | 487  | 54.26  | 6.95  | D  |
| PfbZIP89  | C2S51_012564 | 16 | 57300436 | 57310271 | 1269 | 142.58 | 8.15  | H  |
| PfbZIP90  | C2S51_012715 | 16 | 59036229 | 59040312 | 322  | 35.85  | 5.36  | C  |
| PfbZIP91  | C2S51_013043 | 16 | 63122028 | 63122594 | 188  | 22.16  | 5.44  | S  |
| PfbZIP92  | C2S51_013256 | 16 | 65779078 | 65779758 | 226  | 25.23  | 9.69  | A  |
| PfbZIP93  | C2S51_013540 | 17 | 3909599  | 3912101  | 342  | 37.98  | 6.42  | I  |
| PfbZIP94  | C2S51_013941 | 17 | 17453382 | 17455851 | 565  | 61.79  | 6.21  | I  |
| PfbZIP95  | C2S51_017148 | 19 | 9760251  | 9761921  | 366  | 41.31  | 7.02  | D  |
| PfbZIP96  | C2S51_017863 | 19 | 31255368 | 31259139 | 395  | 41.71  | 6.68  | G  |
| PfbZIP97  | C2S51_018122 | 19 | 51417815 | 51422060 | 364  | 39.72  | 8.57  | C  |
| PfbZIP98  | C2S51_018358 | 19 | 62376272 | 62377284 | 112  | 12.1   | 10.65 | H  |
| PfbZIP99  | C2S51_019255 | 20 | 52499069 | 52500317 | 206  | 23.98  | 5.37  | A  |
| PfbZIP100 | C2S51_019333 | 20 | 55491444 | 55492449 | 277  | 29.91  | 5.11  | A  |
| PfbZIP101 | C2S51_019353 | 20 | 56052495 | 56055240 | 305  | 33.7   | 9.37  | I  |

**Table S3.** Duplication gene pairs of *PfbZIP* genes.

| ID           |              | ID           |              |
|--------------|--------------|--------------|--------------|
| C2S51_001169 | C2S51_002235 | C2S51_030271 | C2S51_033598 |
| C2S51_001169 | C2S51_010640 | C2S51_030271 | C2S51_035146 |
| C2S51_001169 | C2S51_002908 | C2S51_002235 | C2S51_010640 |
| C2S51_002937 | C2S51_010603 | C2S51_002235 | C2S51_002908 |
| C2S51_020224 | C2S51_022630 | C2S51_030360 | C2S51_033661 |
| C2S51_020224 | C2S51_025355 | C2S51_031284 | C2S51_034508 |
| C2S51_020224 | C2S51_027522 | C2S51_031284 | C2S51_013043 |
| C2S51_022229 | C2S51_000027 | C2S51_032111 | C2S51_035968 |
| C2S51_022229 | C2S51_000426 | C2S51_032111 | C2S51_017148 |
| C2S51_022321 | C2S51_025706 | C2S51_032456 | C2S51_018122 |
| C2S51_022321 | C2S51_008317 | C2S51_032655 | C2S51_017863 |
| C2S51_022321 | C2S51_013941 | C2S51_033010 | C2S51_018358 |
| C2S51_022630 | C2S51_025355 | C2S51_033598 | C2S51_035146 |
| C2S51_022630 | C2S51_027522 | C2S51_033598 | C2S51_013043 |
| C2S51_022920 | C2S51_024987 | C2S51_002276 | C2S51_029471 |
| C2S51_022920 | C2S51_026407 | C2S51_034508 | C2S51_013043 |
| C2S51_022920 | C2S51_029630 | C2S51_035968 | C2S51_017148 |
| C2S51_022920 | C2S51_036246 | C2S51_000027 | C2S51_000426 |
| C2S51_023242 | C2S51_024604 | C2S51_003355 | C2S51_010049 |
| C2S51_001228 | C2S51_029471 | C2S51_002305 | C2S51_002937 |
| C2S51_001228 | C2S51_002276 | C2S51_002305 | C2S51_010603 |
| C2S51_023394 | C2S51_024442 | C2S51_003384 | C2S51_010072 |
| C2S51_023820 | C2S51_013256 | C2S51_003549 | C2S51_037514 |
| C2S51_024072 | C2S51_006383 | C2S51_003720 | C2S51_037725 |
| C2S51_024987 | C2S51_029630 | C2S51_004167 | C2S51_019353 |
| C2S51_024987 | C2S51_036246 | C2S51_004167 | C2S51_038307 |
| C2S51_025355 | C2S51_027522 | C2S51_004167 | C2S51_007829 |
| C2S51_025706 | C2S51_008317 | C2S51_004172 | C2S51_038314 |
| C2S51_025706 | C2S51_013941 | C2S51_004172 | C2S51_007809 |
| C2S51_001269 | C2S51_002937 | C2S51_004384 | C2S51_038468 |
| C2S51_001269 | C2S51_002305 | C2S51_004789 | C2S51_011446 |
| C2S51_001269 | C2S51_010603 | C2S51_005961 | C2S51_012715 |
| C2S51_028307 | C2S51_030271 | C2S51_038307 | C2S51_019353 |

|              |              |              |              |
|--------------|--------------|--------------|--------------|
| C2S51_028307 | C2S51_033598 | C2S51_038307 | C2S51_007829 |
| C2S51_028307 | C2S51_035146 | C2S51_007705 | C2S51_019255 |
| C2S51_028562 | C2S51_035357 | C2S51_007809 | C2S51_019333 |
| C2S51_029023 | C2S51_035745 | C2S51_007829 | C2S51_019353 |
| C2S51_029304 | C2S51_032111 | C2S51_002704 | C2S51_010886 |
| C2S51_029304 | C2S51_035968 | C2S51_008317 | C2S51_013941 |
| C2S51_029304 | C2S51_017148 | C2S51_009704 | C2S51_013540 |
| C2S51_029471 | C2S51_036102 | C2S51_002908 | C2S51_010640 |
| C2S51_029630 | C2S51_036246 |              |              |

**Table S4.** Duplication gene pairs of *bZIP* genes from *P. frutescens* and *A. thaliana*.

| <i>P. frutescens</i> | <i>A. thaliana</i> | <i>P. frutescens</i> | <i>A. thaliana</i> |
|----------------------|--------------------|----------------------|--------------------|
| C2S51_001228         | NM_129659.3        | C2S51_023394         | NM_115055.3        |
| C2S51_001228         | NM_115525.2        | C2S51_024442         | NM_115055.3        |
| C2S51_002276         | NM_129659.3        | C2S51_024987         | NM_116107.2        |
| C2S51_002276         | NM_115525.2        | C2S51_028307         | NM_101230.4        |
| C2S51_002523         | NM_001198254.2     | C2S51_028307         | NM_126441.1        |
| C2S51_002523         | NM_001203005.2     | C2S51_028562         | NM_001336591.1     |
| C2S51_002523         | NM_001342246.1     | C2S51_029023         | NM_119837.4        |
| C2S51_002908         | NM_001336890.1     | C2S51_029304         | NM_106441.4        |
| C2S51_003384         | NM_106193.4        | C2S51_029304         | NM_180942.3        |
| C2S51_000027         | NM_130190.3        | C2S51_029304         | NM_121041.5        |
| C2S51_000027         | NM_116342.3        | C2S51_029471         | NM_115525.2        |
| C2S51_000027         | NM_106193.4        | C2S51_029630         | NM_116107.2        |
| C2S51_000027         | NM_127373.2        | C2S51_029630         | NM_124322.3        |
| C2S51_000027         | NM_119625.3        | C2S51_030271         | NM_126441.1        |
| C2S51_004789         | NM_001331770.1     | C2S51_030360         | NM_129624.5        |
| C2S51_005961         | NM_122389.4        | C2S51_031284         | NM_121588.3        |
| C2S51_008317         | NM_120050.4        | C2S51_031284         | NM_123241.3        |
| C2S51_008371         | NM_127229.3        | C2S51_032111         | NM_106441.4        |
| C2S51_008371         | NM_119670.5        | C2S51_032111         | NM_121041.5        |
| C2S51_009704         | NM_100488.4        | C2S51_032655         | NM_102948.4        |
| C2S51_010072         | NM_106193.4        | C2S51_033598         | NM_101230.4        |
| C2S51_010640         | NM_001336890.1     | C2S51_033598         | NM_126441.1        |
| C2S51_011446         | NM_001331770.1     | C2S51_033661         | NM_129624.5        |
| C2S51_012564         | NM_001336002.1     | C2S51_034508         | NM_121588.3        |
| C2S51_012564         | NM_119393.3        | C2S51_034508         | NM_123241.3        |
| C2S51_012715         | NM_122389.4        | C2S51_035146         | NM_101230.4        |
| C2S51_013043         | NM_113954.2        | C2S51_035146         | NM_126441.1        |
| C2S51_013043         | NM_121588.3        | C2S51_035357         | NM_001336591.1     |
| C2S51_013043         | NM_123241.3        | C2S51_035745         | NM_119837.4        |
| C2S51_013941         | NM_120050.4        | C2S51_035968         | NM_106441.4        |
| C2S51_017148         | NM_106441.4        | C2S51_035968         | NM_121041.5        |
| C2S51_017863         | NM_102948.4        | C2S51_036057         | NM_001202651.1     |
| C2S51_019353         | NM_103495.4        | C2S51_036057         | NM_114836.3        |

|              |                |              |             |
|--------------|----------------|--------------|-------------|
| C2S51_019884 | NM_105536.4    | C2S51_036246 | NM_116107.2 |
| C2S51_020868 | NM_100488.4    | C2S51_000426 | NM_180038.2 |
| C2S51_022229 | NM_130190.3    | C2S51_037958 | NM_106193.4 |
| C2S51_022229 | NM_116342.3    | C2S51_037958 | NM_127373.2 |
| C2S51_022321 | NM_001335735.1 | C2S51_037958 | NM_119625.3 |
| C2S51_022321 | NM_120050.4    | C2S51_038468 | NM_130190.3 |
| C2S51_022920 | NM_116107.2    | C2S51_038468 | NM_116342.3 |

**Table S5.** Duplication gene pairs of *bZIP* genes from *P. frutescens* and *S. indicum*.

| <i>P. frutescens</i> | <i>S. indicum</i> | <i>P. frutescens</i> | <i>S. indicum</i> |
|----------------------|-------------------|----------------------|-------------------|
| C2S51_001169         | XM_011071683.2    | C2S51_022321         | XM_011085193.2    |
| C2S51_001169         | XM_011080830.2    | C2S51_022321         | XM_011090244.2    |
| C2S51_001228         | XM_020691729.1    | C2S51_022630         | XM_011077550.2    |
| C2S51_001228         | XM_011080786.2    | C2S51_022630         | XM_011086288.2    |
| C2S51_001269         | XM_011077123.2    | C2S51_022920         | XM_011081252.2    |
| C2S51_001269         | XM_011080767.2    | C2S51_022920         | XM_011084120.2    |
| C2S51_002235         | XM_011071683.2    | C2S51_023394         | XM_020697055.1    |
| C2S51_002235         | XM_011080830.2    | C2S51_023820         | XM_011082182.2    |
| C2S51_002276         | XM_020691729.1    | C2S51_023820         | XM_011091902.2    |
| C2S51_002276         | XM_011080786.2    | C2S51_024442         | XM_020697055.1    |
| C2S51_002305         | XM_011077123.2    | C2S51_024604         | XM_011082424.1    |
| C2S51_002305         | XM_011080767.2    | C2S51_024987         | XM_011081252.2    |
| C2S51_002523         | XM_011076125.2    | C2S51_024987         | XM_011084120.2    |
| C2S51_002523         | XM_011089948.2    | C2S51_025355         | XM_011077550.2    |
| C2S51_002704         | XM_020694012.1    | C2S51_025355         | XM_011086288.2    |
| C2S51_002908         | XM_011071683.2    | C2S51_025469         | XM_011089512.2    |
| C2S51_002908         | XM_011080833.2    | C2S51_025706         | XM_011085193.2    |
| C2S51_002937         | XM_011077123.2    | C2S51_025706         | XM_011090244.2    |
| C2S51_002937         | XM_011080767.2    | C2S51_026235         | XM_011076874.2    |
| C2S51_003355         | XM_011076344.2    | C2S51_026235         | XM_011080551.2    |
| C2S51_003384         | XM_011076685.2    | C2S51_026407         | XM_011081252.2    |
| C2S51_003384         | XM_011085319.2    | C2S51_026407         | XM_011102473.2    |
| C2S51_003549         | XM_011075373.2    | C2S51_027522         | XM_011077550.2    |
| C2S51_003549         | XM_020698904.1    | C2S51_027522         | XM_011086288.2    |
| C2S51_003720         | XM_011084427.2    | C2S51_028307         | XM_011079474.2    |
| C2S51_004167         | XM_011103188.2    | C2S51_028562         | XM_011096053.2    |
| C2S51_004167         | XM_011076706.2    | C2S51_029023         | XM_011098912.2    |
| C2S51_004172         | XM_011103049.2    | C2S51_029023         | XM_011101283.2    |
| C2S51_000027         | XM_011095049.2    | C2S51_029304         | XM_011092274.2    |
| C2S51_004384         | XM_011076685.2    | C2S51_029304         | XM_020698619.1    |
| C2S51_004384         | XM_011085319.2    | C2S51_029471         | XM_020691729.1    |
| C2S51_004789         | XM_020696539.1    | C2S51_029471         | XM_011080786.2    |
| C2S51_005961         | XM_011077677.2    | C2S51_029630         | XM_011084120.2    |



|              |                |              |                |
|--------------|----------------|--------------|----------------|
| C2S51_007809 | XM_011103049.2 | C2S51_029630 | XM_011081252.2 |
| C2S51_007829 | XM_011103188.2 | C2S51_030271 | XM_011079474.2 |
| C2S51_008317 | XM_011090244.2 | C2S51_030360 | XM_011078285.2 |
| C2S51_008371 | XM_020695942.1 | C2S51_030360 | XM_011086520.2 |
| C2S51_008371 | XM_011094670.2 | C2S51_030554 | XM_020693145.1 |
| C2S51_009704 | XM_020692310.1 | C2S51_031284 | XM_011087366.2 |
| C2S51_009704 | XM_011093336.2 | C2S51_031284 | XM_011100769.2 |
| C2S51_010049 | XM_011076344.2 | C2S51_032111 | XM_011092274.2 |
| C2S51_010072 | XM_011076685.2 | C2S51_032111 | XM_020698619.1 |
| C2S51_010603 | XM_011077123.2 | C2S51_032655 | XM_011076291.2 |
| C2S51_010603 | XM_011080767.2 | C2S51_032655 | XM_011084006.2 |
| C2S51_010640 | XM_011071683.2 | C2S51_033010 | XM_011083277.2 |
| C2S51_010640 | XM_011080830.2 | C2S51_033598 | XM_011079474.2 |
| C2S51_010886 | XM_011093646.2 | C2S51_033598 | XM_011100769.2 |
| C2S51_011446 | XM_020696539.1 | C2S51_033598 | XM_011078285.2 |
| C2S51_012564 | XM_011072866.2 | C2S51_033661 | XM_011086520.2 |
| C2S51_012564 | XM_011083276.2 | C2S51_034184 | XM_011079579.2 |
| C2S51_012715 | XM_011077677.2 | C2S51_034184 | XM_011096084.2 |
| C2S51_013043 | XM_011079474.2 | C2S51_034508 | XM_011087366.2 |
| C2S51_013043 | XM_011087366.2 | C2S51_034508 | XM_011100769.2 |
| C2S51_013043 | XM_011100769.2 | C2S51_035146 | XM_011079474.2 |
| C2S51_013256 | XM_011082182.2 | C2S51_035357 | XM_011096053.2 |
| C2S51_013256 | XM_011091902.2 | C2S51_035745 | XM_011098912.2 |
| C2S51_013540 | XM_020692310.1 | C2S51_035745 | XM_011101283.2 |
| C2S51_013540 | XM_011093336.2 | C2S51_035968 | XM_011092274.2 |
| C2S51_013941 | XM_011090244.2 | C2S51_035968 | XM_020698619.1 |
| C2S51_017148 | XM_011099591.2 | C2S51_036057 | XM_011075373.2 |
| C2S51_017148 | XM_020698619.1 | C2S51_036057 | XM_020698904.1 |
| C2S51_017863 | XM_011076291.2 | C2S51_036102 | XM_011080786.2 |
| C2S51_017863 | XM_011084006.2 | C2S51_036246 | XM_011084120.2 |
| C2S51_018122 | XM_011093646.2 | C2S51_036246 | XM_011081252.2 |
| C2S51_018358 | XM_011083277.2 | C2S51_037514 | XM_020698904.1 |
| C2S51_019333 | XM_011103049.2 | C2S51_037725 | XM_011084427.2 |
| C2S51_019353 | XM_011103188.2 | C2S51_037958 | XM_011084427.2 |
| C2S51_019884 | XM_011078850.2 | C2S51_037958 | XM_011101921.2 |
| C2S51_019884 | XM_020699262.1 | C2S51_038307 | XM_011103188.2 |

|              |                |              |                |
|--------------|----------------|--------------|----------------|
| C2S51_020224 | XM_011077550.2 | C2S51_038307 | XM_011076706.2 |
| C2S51_020224 | XM_011086288.2 | C2S51_038314 | XM_011103049.2 |
| C2S51_020868 | XM_020692310.1 | C2S51_038468 | XM_011076685.2 |
| C2S51_020868 | XM_011093336.2 | C2S51_038468 | XM_011085319.2 |
| C2S51_022229 | XM_011095049.2 | C2S51_000426 | XM_011095049.2 |

**Table S6.** Bacterial and yeast strains and plasmids used in this study.

| Strain or plasmid             | Description                                        |
|-------------------------------|----------------------------------------------------|
| Strains                       |                                                    |
| Escherichia coli DH5 $\alpha$ | Strain used for plasmid construction               |
| Agrobacterium GV3101          | Overexpression of target genes mediated in tobacco |
| Y187 yeast strain             | Strain used for Y1H assay                          |
| Plasmids                      |                                                    |
| pHIS2                         | Promoter bait vector for Y1H assay                 |
| pHIS2-P53                     | Positive control of bait vector for Y1H assay      |
| pGADT7                        | Transcription factor prey vector for Y1H assay     |
| pGAD53m                       | Positive control of prey vector for Y1H assay      |
| pCAMBIA1300                   | Protein subcellular localization vector            |
| pCAMBIA1301                   | Overexpression vector of promoter                  |
| pCAMBIA1303                   | Constituent plant overexpression vector            |
| pJC-Gly-DSRB                  | Seed-specific plant overexpression vector          |

**Table S7.** Primer sequences used in this study.

| Gene       | Forward primer (5'→3') | Reverse primer (5'→3')   |
|------------|------------------------|--------------------------|
| PfbZIP1-q  | GGGGAAGGTGTTGATGGT     | CCTCCAATGTCATCTCCC       |
| PfbZIP4-q  | CAGTCCTCGTCTGGCTTG     | ATTTTCTTACCTCCCGCT       |
| PfbZIP5-q  | CGATCACCTCCTTAACCC     | GAATCCCCGAACCATAGC       |
| PfbZIP9-q  | TCAATCTCCGCAGTTCCT     | GCAACCCTCTTTCGTCTT       |
| PfbZIP33-q | CAACACACACTTTGCGAG     | GAGGCTCTGGGATGCTAA       |
| PfbZIP48-q | AGCAATTCCGTGGATAGC     | CGTTGCTTCAGTTTGGAG       |
| PfbZIP71-q | TCTTCAGACAACTCGCCG     | AGCCAAAGCCGCTATCC        |
| PfbZIP91-q | AGTTGTCTGGCTCCGTAA     | ACTTGTGGCACTTCTTCAT      |
| PfbZIP85-q | CAGACTCCAGTTCACATACA   | CTTCAGGCGGCTATTCTC       |
| PfActin2-q | AGACCTTCAATGTGCCAGCCA  | CACGACCAGCAAGATCCAACC    |
| NtLPAT1-q  | ACCTTGACCATTACTCCATT   | GCATCGCTTGAGACATTC       |
| NtDGAT2-q  | GTTAGGACTTGACCCCGCTA   | ACCAGTGGTTTGCCCATCTC     |
| NtFAD2-q   | AGCCGAAATCACAACTCGGA   | GCCAAGCTAGCCCTTTTACCA    |
| NtSAD1-q   | ATGGCTGCTAGCCTTCGTTC   | GATCCGCCCAGTCCTCCATA     |
| NtFAD3-q   | TCTGCACTGCCTTTGGTTCT   | TTTGCTGCTTTGGTCGCTTC     |
| NtLPCAT-q  | CTCTGAAGCTGCTATCGTCGT  | TCCTTCCTTTCTGTATCAGCCTC  |
| NtDGAT1-q  | GCACGCCAATTCATCAAG     | AACATAGTAGTTCCGCAAGT     |
| NtPDCT-q   | CTTCTTCCCCGCCTTTCGAT   | AAATCAACGCCTGACCCCAA     |
| NtPDAT-q   | ACCAGATGCACCTGACATGG   | CGCTTAATGCAGGCACAGTC     |
| NtDGAT3-q  | GCAGAGGAGAAGGAGTTG     | GTCCGAGGCTCAATCATAT      |
| NtGPAT9-q  | GGCTGTTGTCTGTGATGT     | AACTCTGTTGCTTCCTCTC      |
| NtLPAT2-q  | CAGGTCTTCAACGGCTAA     | TAGTGCGAGGAATCAATACA     |
| NtActin-q  | CAGTGGCCGTACAACAGGTA   | AACCGAAGAATTGCATGAGG     |
| GUS        | TGGTGATGTGGAGTATTGC    | CTGATGGTATCGGTGTGAG      |
| bZIP52-    | GTGGGCATCGATACGGGATCCA | ACGATTCATCTGCAGCTCGAGTCA |
| PGADT7     | TGGATGGAGGTTGTGAGCAA   | GTAAGGACAGCTGAAACTCCTC   |

---

|                     |                                                              |                                                       |
|---------------------|--------------------------------------------------------------|-------------------------------------------------------|
| bZIP85-<br>PGADT7   | GCCATGGAGGCCAGTGAATTCA<br>TGGCTAGAGCTACAGTAAATATT<br>GGTG    | CCGTATCGATGCCCCACCCGGGTCA<br>TTCTTTAGGCCTTGCAAGC      |
| roPflPAT1B-<br>1301 | GACCTGCAGGCATGCAAGCTTA<br>ACAACCTTCAATAAAATAACCA<br>CAAG     | TTACCCTCAGATCTACCATGGTGG<br>TTACTATAATTTTGATTAATTTGCC |
| bZIP85-1300         | ATACACCAAATCGACTCTAGAAT<br>GGCTAGAGCTACAGTAAATATT<br>GGTG    | GCCCTTGCTCACCATGGTACCTCA<br>TTCTTTAGGCCTTGCAAGC       |
| bZIP85-1303         | AACCTGCAGGTCGACTCTAGAAT<br>GGCTAGAGCTACAGTAAATATT<br>GGTG    | GGTTTAAACGAGCTCGGTACCTCA<br>TTCTTTAGGCCTTGCAAGC       |
| bZIP85-DSRB         | CACCATGTTGGGCCCCGGCGCGCC<br>ATGGCTAGAGCTACAGTAAATAT<br>TGGTG | GTTGTCACATACATCGGCGCGCCT<br>CATTCTTTAGGCCTTGCAAGC     |

---
